# Supplementary material for: Precise control of the size and gap between gold nanocubes by surface-based synthesis for high SERS performance
Source: Royal Society of Chemistry journal article supplement (doi:10.1039/c9sm02405k), 2020-01-01
Supplement: c9sm02405k1.pdf [file c9sm02405k1.pdf]

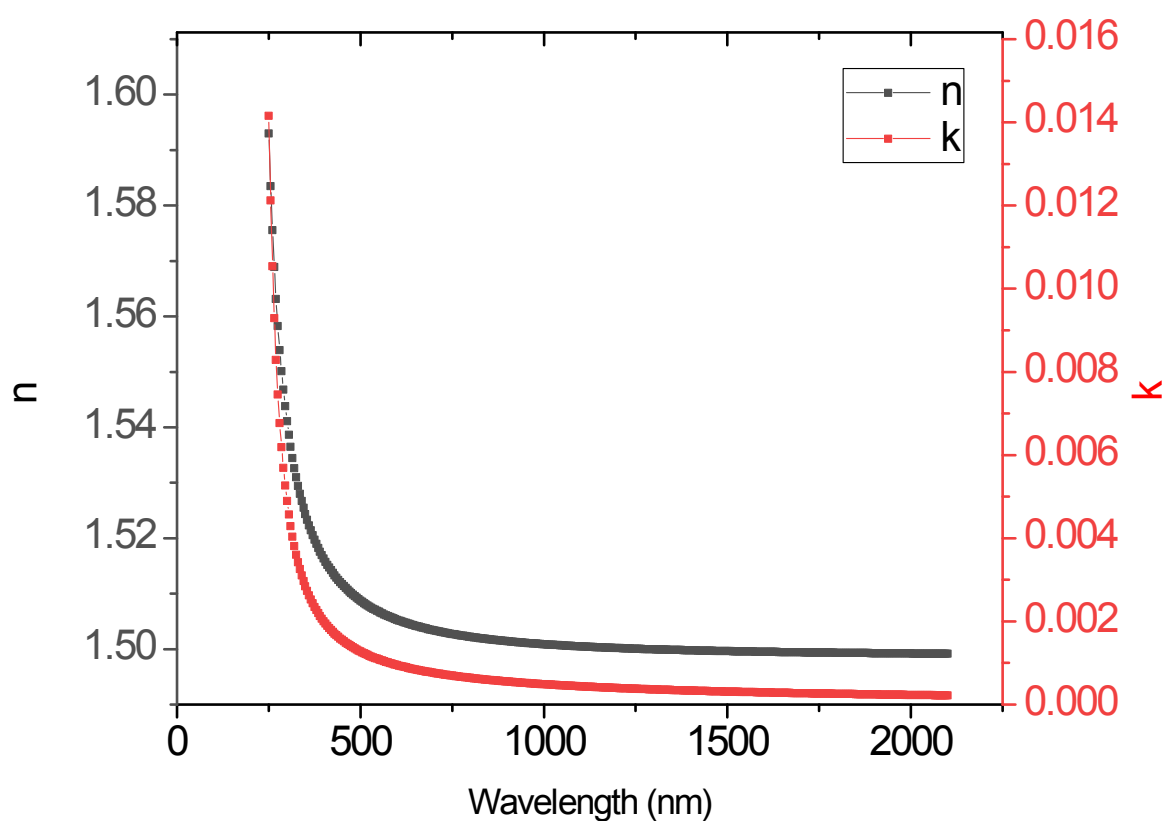

FIG. S1 Refractive index ( $n$ ) and extinction coefficient ( $k$ ) of PMMA film as a function of wavelength (nm). The film was prepared by spin-coating with 5000 rpm a dispersion of PMMA of 30 g/l (the same concentration used for the PMMA/gold precursor mixtures) on a silicon wafer. One can see that PMMA don't present any optical response on the whole spectral range of measurements.
